# Supplementary material
Source: PubMed Central journal article supplement (PMC6187616)
Supplement: supp_RA118.004948_139523_1_supp_193120_p96qxg.pdf [file supp_RA118.004948_139523_1_supp_193120_p96qxg.pdf]

## SUPPORTING INFORMATION

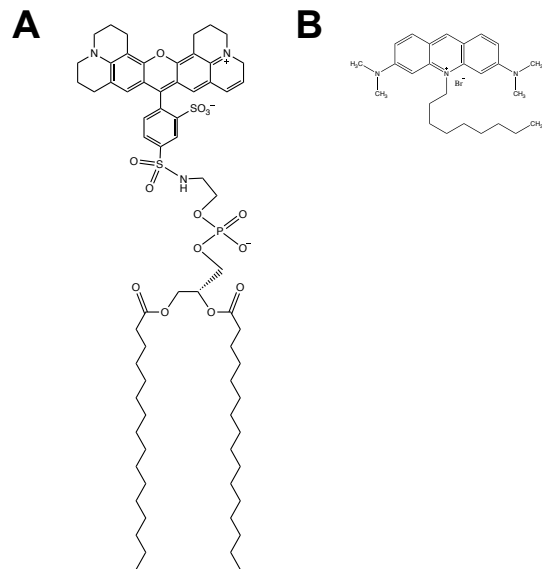

**Supplemental Figure 1. Molecular structures of the fluorescent probes used to visualize microdomain organization for imaging studies.** Structures are depicted for (A) Texas Red DHPE (TX RED) and (B) nonyl acridine orange (NAO).

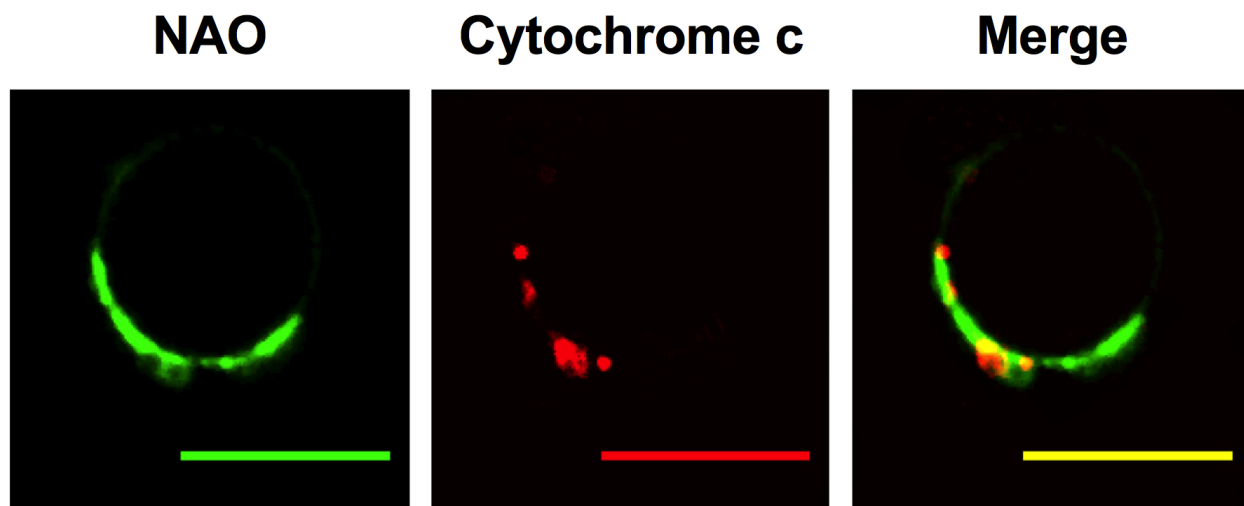

**Supplemental Figure 2. Immunofluorescence of cytochrome c (cyt c) and NAO.** Representative images of GUVs composed of (18:0-22:6)PC/(16:0-20:4)PE/(18:2)<sub>4</sub>CL/DOPI/DOPS/Chol (39.9/30/20/5/3/2 mol%) and NAO (0.1 mol%) in the presence of 17  $\mu$ M cyt c. Cyt c was visualized by a mouse monoclonal cytochrome c primary antibody conjugated with Alexa Fluor 647. Binding of cyt c to GUVs induced phase segregation as observed by NAO. Images are representative from a total of 10 GUVs analyzed and the average Pearson's correlation coefficient was determined to be 45.1%.

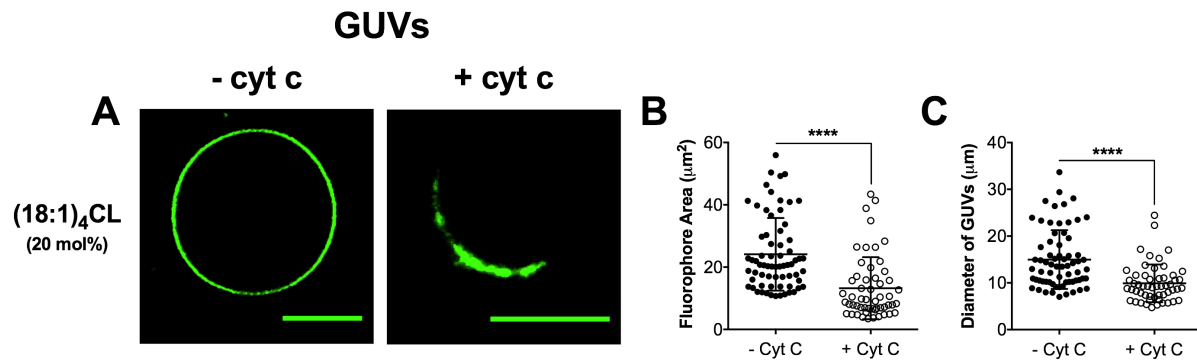

**Supplemental Figure 3. Lipid microdomain formation is not perturbed upon replacement of (18:2)<sub>4</sub>CL with (18:1)<sub>4</sub>CL.** Representative images of (A) GUVs composed of (18:0-22:6)PC/(16:0-20:4)PE/(18:1)<sub>4</sub>CL/DOPI/DOPS/Chol (39.9/30/20/5/3/2 mol%) and NAO (0.1 mol%) in the absence (left panel) and presence (right panel) of 3.8  $\mu\text{M}$  cyt c. The (B) average fluorophore area of NAO and the (C) average GUV diameter was determined. Each dot represents a single GUV. Data are  $\pm$  SD from a total of 50–65 vesicles analyzed from 3 independent experiments.
